# Supplementary material for: Genomic, epigenomic, and immune subtype analysis of CTSL/B and SARS-CoV-2 receptor ACE2 in pan-cancer
Source: publisher site journal article supplement (doi:10.18632/aging.104147), 2020-11-20
Supplement: Supplementary file [file aging-v12i22-104147-supplementary-material-SD2.pdf]

## SUPPLEMENTARY TABLES

**Supplementary Table 1. The distribution of CTSL in PAAD, STAD and their normal tissues.**

| Cancer types | Dataset                    | Tumor (Cases)                              | Normal (Cases)                          | Fold change | t-Test | P-value  |
|--------------|----------------------------|--------------------------------------------|-----------------------------------------|-------------|--------|----------|
| PAAD         | Badea Pancreas             | Pancreatic Ductal Adenocarcinoma(39)       | Pancreas(39)                            | 3.124       | 8.078  | 1.40E-11 |
|              | Segara Pancreas            | Pancreatic Carcinoma(11)                   | Pancreas(6)                             | 3.233       | 3.966  | 7.32E-04 |
|              | Iacobuzio-Donahue Pancreas | Pancreatic Adenocarcinoma(12)              | Pancreas(5)                             | 2.811       | 4.173  | 0.004    |
|              | Grutzmann Pancreas         | Pancreatic Ductal Adenocarcinoma(11)       | Pancreas Duct(11)                       | 1.791       | 1.667  | 0.056    |
| STAD         | Pei Pancreas               | Pancreatic Carcinoma(36)                   | Pancreas(16)                            | 2.443       | 3.482  | 0.001    |
|              | Chen Gastric               | Gastric Intestinal Type Adenocarcinoma(64) | Gastric Mucosa(29)                      | 2.424       | 13.942 | 9.87E-22 |
|              | Chen Gastric               | Diffuse Gastric Adenocarcinoma(13)         | Gastric Mucosa(29)                      | 1.834       | 6.328  | 2.24E-06 |
|              | Chen Gastric               | Gastric Mixed Adenocarcinoma(8)            | Gastric Mucosa(29)                      | 3.357       | 7.385  | 3.01E-05 |
|              | DErrico Gastric            | Gastric Mixed Adenocarcinoma(4)            | Gastric Mucosa(31)                      | 2.847       | 16.872 | 3.40E-10 |
|              | DErrico Gastric            | Gastric Intestinal Type Adenocarcinoma(26) | Gastric Mucosa(31)                      | 3.837       | 10.142 | 2.67E-14 |
|              | DErrico Gastric            | Diffuse Gastric Adenocarcinoma(6)          | Gastric Mucosa(31)                      | 2.378       | 4.596  | 1.00E-03 |
|              | Gui Gastric                | Gastric Cancer(80)                         | Gastric Tissue(80)                      | 1.594       | 6.047  | 5.15E-09 |
|              | Cho Gastric                | Gastric Intestinal Type Adenocarcinoma(20) | Gastric Tissue(19)                      | 1.797       | 5.201  | 5.44E-06 |
|              | Cho Gastric                | Diffuse Gastric Adenocarcinoma(31)         | Gastric Tissue(19)                      | 1.776       | 6.056  | 1.05E-07 |
|              | Cho Gastric                | Gastric Adenocarcinoma(4)                  | Gastric Tissue(19)                      | 2.073       | 2.696  | 3.30E-02 |
|              | Wang Gastric               | Gastric Cancer(12)                         | Gastric Tissue(12)<br>Gastric Mucosa(3) | 1.948       | 3.419  | 1.00E-03 |

PAAD: Pancreatic adenocarcinoma; STAD: Stomach Adenocarcinoma.

**Supplementary Table 2. The distribution of CTSB in PAAD, STAD and their normal tissues.**

| Cancer types | Dataset                      | Tumor(Cases)                               | Normal(Cases)                           | Fold change | t-Test | P-value  |
|--------------|------------------------------|--------------------------------------------|-----------------------------------------|-------------|--------|----------|
| PAAD         | Logsdon Pancreas             | Pancreatic Adenocarcinoma(10)              | Pancreas(5)                             | 1.614       | 2.225  | 0.022    |
|              | Badea Pancreas               | Pancreatic Ductal Adenocarcinoma(39)       | Pancreas(39)                            | 1.975       | 6.077  | 3.70E-08 |
|              | Iacobuzio-Donahue Pancreas 2 | Pancreatic Adenocarcinoma(12)              | Pancreas(5)                             | 1.797       | 1.727  | 0.069    |
|              | Pei Pancreas                 | Pancreatic Carcinoma(36)                   | Pancreas(16)                            | 1.514       | 2.525  | 0.009    |
| STAD         | Chen Gastric                 | Gastric Mixed Adenocarcinoma(8)            | Gastric Mucosa(29)                      | 2.844       | 11.259 | 4.29E-09 |
|              | Chen Gastric                 | Gastric Intestinal Type Adenocarcinoma(67) | Gastric Mucosa(29)                      | 2.717       | 14.424 | 6.38E-22 |
|              | Chen Gastric                 | Diffuse Gastric Adenocarcinoma(13)         | Gastric Mucosa(29)                      | 2.538       | 5.275  | 5.12E-05 |
|              | DErrico Gastric              | Gastric Intestinal Type Adenocarcinoma(26) | Gastric Mucosa(31)                      | 2.357       | 8.821  | 7.30E-11 |
|              | DErrico Gastric              | Diffuse Gastric Adenocarcinoma(6)          | Gastric Mucosa(31)                      | 1.887       | 4.323  | 3.00E-03 |
|              | DErrico Gastric              | Gastric Mixed Adenocarcinoma(4)            | Gastric Mucosa(31)                      | 2.772       | 3.866  | 1.40E-02 |
|              | Wang Gastric                 | Gastric Cancer(12)                         | Gastric Mucosa(12)<br>Gastric Tissue(3) | 2.273       | 3.988  | 5.18E-04 |
|              | Cho Gastric                  | Diffuse Gastric Adenocarcinoma(31)         | Gastric Tissue(19)                      | 1.793       | 3.673  | 3.07E-04 |

PAAD: Pancreatic adenocarcinoma; STAD: Stomach Adenocarcinoma.

**Supplementary Table 3. The CpG methylation probes located in promoters of CTSL/B and ACE2.**

| Gene Symbol | CpG        | Group         | Relation To Island |
|-------------|------------|---------------|--------------------|
| CTSL        | cg11154542 | TSS1500       | N_Shore            |
| CTSL        | cg11306701 | 5'UTR         | Island             |
| CTSL        | cg13985445 | TSS1500       | N_Shore            |
| CTSL        | cg14236855 | 5'UTR;1stExon | Island             |
| CTSL        | cg14243623 | 5'UTR;1stExon | Island             |
| CTSL        | cg14557714 | 5'UTR         | Island             |
| CTSL        | cg15242570 | 5'UTR;1stExon | Island             |
| CTSB        | cg00057317 | 5'UTR         | Island             |
| CTSB        | cg00276098 | TSS1500       | S_Shore            |
| CTSB        | cg02637136 | 5'UTR;1stExon | Island             |
| CTSB        | cg04315434 | TSS1500       | Island             |
| CTSB        | cg08012294 | 5'UTR         | N_Shore            |
| CTSB        | cg16624891 | 5'UTR         | OpenSea            |
| CTSB        | cg17019285 | 5'UTR         | Island             |
| CTSB        | cg18787975 | TSS1500       | S_Shore            |
| CTSB        | cg20539307 | 5'UTR         | OpenSea            |
| CTSB        | cg21281001 | 5'UTR         | Island             |
| CTSB        | cg21756720 | 5'UTR         | N_Shore            |
| CTSB        | cg21919729 | 5'UTR         | OpenSea            |
| CTSB        | cg22139271 | 5'UTR;1stExon | Island             |
| CTSB        | cg26407100 | TSS1500       | Island             |
| ACE2        | cg05748796 | 5'UTR         | OpenSea            |
| ACE2        | cg08559914 | TSS200        | OpenSea            |
| ACE2        | cg16734967 | 5'UTR;1stExon | OpenSea            |
| ACE2        | cg18458833 | TSS1500       | OpenSea            |
| ACE2        | cg18877734 | TSS1500       | OpenSea            |
| ACE2        | cg21598868 | TSS1500       | OpenSea            |

**Supplementary Table 4. The correlation analysis of DNA methylation level of CTSL to its gene expression in pan-cancer.**

| <b>Disease</b> | <b>GeneSymbol</b> | <b>Pearson R</b> | <b>Pearson p-value</b> |
|----------------|-------------------|------------------|------------------------|
| BLCA           | CTSL              | -0.00312611      | 0.948826               |
| BRCA           | CTSL              | -0.027521        | 0.418322               |
| CESC           | CTSL              | -0.366557        | 0                      |
| CHOL           | CTSL              | -0.239902        | 0.112444               |
| COAD           | CTSL              | -0.0123726       | 0.82659                |
| ESCA           | CTSL              | -0.252473        | 0.000863984            |
| GBM            | CTSL              | -0.255165        | 0.04186                |
| HNSC           | CTSL              | -0.301539        | 0                      |
| KIRC           | CTSL              | -0.0301101       | 0.578949               |
| KIRP           | CTSL              | -0.0844174       | 0.146702               |
| LIHC           | CTSL              | -0.0159312       | 0.74655                |
| LUAD           | CTSL              | -0.0655713       | 0.153184               |
| LUSC           | CTSL              | -0.148525        | 0.00384861             |
| PAAD           | CTSL              | -0.0665734       | 0.371896               |
| PCPG           | CTSL              | -0.0782841       | 0.289514               |
| PRAD           | CTSL              | 0.0319835        | 0.462059               |
| READ           | CTSL              | 0.0645515        | 0.521309               |
| SARC           | CTSL              | 0.0854136        | 0.167247               |
| SKCM           | CTSL              | -0.340934        | 0                      |
| STAD           | CTSL              | -0.0153432       | 0.778991               |
| THCA           | CTSL              | 0.11606          | 0.00601102             |
| THYM           | CTSL              | -0.142602        | 0.118683               |
| UCEC           | CTSL              | 0.0546759        | 0.240321               |

BLCA: Bladder Urothelial Carcinoma; BRCA: Breast invasive carcinoma; CESC: Cervical squamous cell carcinoma and endocervical adenocarcinoma; CHOL: Cholangio carcinoma; COAD: Colon adenocarcinoma; ESCA: Esophageal carcinoma; GBM: Glioblastoma multiforme; HNSC: Head and Neck squamous cell carcinoma; KICH: Kidney Chromophobe; KIRC: Kidney renal clear cell carcinoma; KIRP: Kidney renal papillary cell carcinoma; LIHC: Liver hepatocellular carcinoma; LMS: Leiomyosarcoma; LUAD: Lung: adenocarcinoma; LUSC: Lung squamous cell carcinoma; PAAD: Pancreatic adenocarcinoma; PCPG: Pheochromocytoma and Paraganglioma; PRAD: Prostate adenocarcinoma; READ: Rectum adenocarcinoma; SARC: Sarcoma; SKCM: Skin Cutaneous Melanoma; STAD: Stomach Adenocarcinoma; THCA: Thyroid carcinoma; THYM: Thymoma; UCEC: Uterine Corpus Endometrial Carcinoma;  $0.1 < |R| < 0.3$  and  $P < 0.05$  was regarded as weak correlation;  $0.3 < |R| < 0.5$  and  $P < 0.05$  was regarded as moderate correlation;  $|R| > 0.5$  and  $P < 0.05$  was regarded as strong correlation.

**Supplementary Table 5. The correlation analysis of DNA methylation level of ACE2 to its gene expression in pan-cancer.**

| <b>Disease</b> | <b>GeneSymbol</b> | <b>Pearson R</b> | <b>Pearson p value</b> |
|----------------|-------------------|------------------|------------------------|
| BLCA           | ACE2              | -0.22944         | 0.000001803            |
| BRCA           | ACE2              | -0.150097        | 9.0638E-06             |
| CESC           | ACE2              | 0.0420417        | 0.461514               |
| CHOL           | ACE2              | 0.000887264      | 0.995385               |
| COAD           | ACE2              | -0.594137        | 1.5447e-31             |
| ESCA           | ACE2              | -0.123937        | 0.106303               |
| GBM            | ACE2              | -0.00669388      | 0.958133               |
| HNSC           | ACE2              | -0.114473        | 0.00885114             |
| KIRC           | ACE2              | -0.0672159       | 0.215015               |
| KIRP           | ACE2              | 0.104754         | 0.0714444              |
| LIHC           | ACE2              | -0.365046        | 0                      |
| LUAD           | ACE2              | -0.208215        | 4.6257E-06             |
| LUSC           | ACE2              | -0.0820471       | 0.111732               |
| PAAD           | ACE2              | 0.214959         | 0.00356698             |
| PCPG           | ACE2              | 0.0938661        | 0.203775               |
| PRAD           | ACE2              | -0.00895685      | 0.836858               |
| READ           | ACE2              | -0.51804         | 2.89e-8                |
| SARC           | ACE2              | 0.100805         | 0.102859               |
| SKCM           | ACE2              | 0.0787119        | 0.0893085              |
| STAD           | ACE2              | -0.0777361       | 0.154476               |
| THCA           | ACE2              | 0.156607         | 0.000201307            |
| THYM           | ACE2              | 0.0975874        | 0.286938               |

BLCA: Bladder Urothelial Carcinoma; BRCA: Breast invasive carcinoma; CESC: Cervical squamous cell carcinoma and endocervical adenocarcinoma; CHOL: Cholangio carcinoma; COAD: Colon adenocarcinoma; ESCA: Esophageal carcinoma; GBM: Glioblastoma multiforme; HNSC: Head and Neck squamous cell carcinoma; KICH: Kidney Chromophobe; KIRC: Kidney renal clear cell carcinoma; KIRP: Kidney renal papillary cell carcinoma; LIHC: Liver hepatocellular carcinoma; LMS: Leiomyosarcoma; LUAD: Lung: adenocarcinoma; LUSC: Lung squamous cell carcinoma; PAAD: Pancreatic adenocarcinoma; PCPG: Pheochromocytoma and Paraganglioma; PRAD: Prostate adenocarcinoma; READ: Rectum adenocarcinoma; SARC: Sarcoma; SKCM: Skin Cutaneous Melanoma; STAD: Stomach Adenocarcinoma; THCA: Thyroid carcinoma; THYM: Thymoma; UCEC: Uterine Corpus Endometrial Carcinoma; 0.1<|R|<0.3 and P<0.05 was regarded as weak correlation; 0.3<|R|<0.5 and P<0.05 was regarded as moderate correlation; |R|>0.5 and P<0.05 was regarded as strong correlation.

**Supplementary Table 6. The correlation analysis of DNA methylation level of CTSB to its gene expression in pan-cancer.**

| <b>Disease</b> | <b>GeneSymbol</b> | <b>Pearson R</b> | <b>Pearson p value</b> |
|----------------|-------------------|------------------|------------------------|
| BLCA           | CTSB              | -0.0862408       | 0.0760846              |
| BRCA           | CTSB              | -0.101124        | 0.00287371             |
| CESC           | CTSB              | 0.0331376        | 0.561709               |
| CHOL           | CTSB              | -0.334951        | 0.0245063              |
| COAD           | CTSB              | -0.0965971       | 0.0864639              |
| ESCA           | CTSB              | -0.283268        | 0.000173876            |
| GBM            | CTSB              | 0.00697352       | 0.956386               |
| HNSC           | CTSB              | -0.0901373       | 0.0395278              |
| KIRC           | CTSB              | 0.114073         | 0.0349671              |
| KIRP           | CTSB              | -0.125537        | 0.0305488              |
| LIHC           | CTSB              | -0.183504        | 0.000173767            |
| LUAD           | CTSB              | -0.0666532       | 0.146504               |
| LUSC           | CTSB              | -0.161446        | 0.00166104             |
| PAAD           | CTSB              | -0.187391        | 0.0113059              |
| PCPG           | CTSB              | -0.114122        | 0.121919               |
| PRAD           | CTSB              | -0.284738        | 0                      |
| READ           | CTSB              | -0.239448        | 0.0158798              |
| SARC           | CTSB              | -0.0538639       | 0.384302               |
| SKCM           | CTSB              | -0.194021        | 2.42374E-05            |
| STAD           | CTSB              | -0.118964        | 0.028996               |
| THCA           | CTSB              | -0.0641417       | 0.129853               |
| THYM           | CTSB              | 0.00115651       | 0.989955               |
| UCEC           | CTSB              | 0.11232          | 0.0156076              |

BLCA: Bladder Urothelial Carcinoma; BRCA: Breast invasive carcinoma; CESC: Cervical squamous cell carcinoma and endocervical adenocarcinoma; CHOL: Cholangio carcinoma; COAD: Colon adenocarcinoma; ESCA: Esophageal carcinoma; GBM: Glioblastoma multiforme; HNSC: Head and Neck squamous cell carcinoma; KICH: Kidney Chromophobe; KIRC: Kidney renal clear cell carcinoma; KIRP: Kidney renal papillary cell carcinoma; LIHC: Liver hepatocellular carcinoma; LMS: Leiomyosarcoma; LUAD: Lung: adenocarcinoma; LUSC: Lung squamous cell carcinoma; PAAD: Pancreatic adenocarcinoma; PCPG: Pheochromocytoma and Paraganglioma; PRAD: Prostate adenocarcinoma; READ: Rectum adenocarcinoma; SARC: Sarcoma; SKCM: Skin Cutaneous Melanoma; STAD: Stomach Adenocarcinoma; THCA: Thyroid carcinoma; THYM: Thymoma; UCEC: Uterine Corpus Endometrial Carcinoma; 0.1<|R|<0.3 and P<0.05 was regarded as weak correlation; 0.3<|R|<0.5 and P<0.05 was regarded as moderate correlation; |R|>0.5 and P<0.05 was regarded as strong correlation.
